# Supplementary material for: Exosomal hsa-miR-21-5p is a biomarker for breast cancer diagnosis
Source: PeerJ. 2021 Sep 17;9:e12147. doi: 10.7717/peerj.12147 (PMC8451442; doi:10.7717/peerj.12147)
Supplement: Supplemental Information 2 [file peerj-09-12147-s002.xls]

## Sheet: 479_DE-mRNAs _of_GSE29044
479_DE-mRNAs _of_GSE29044
ID	adj.P.Val	P.Value	logFC	Gene.symbol	Gene.title
205941_s_at	3.95e-25	7.22e-30	6.01	COL10A1	collagen type X alpha 1 chain
1552509_a_at	7.22e-24	2.64e-28	-3.63	CD300LG	CD300 molecule like family member g
217428_s_at	6.89e-23	3.78e-27	4.96	COL10A1	collagen type X alpha 1 chain
229839_at	1.34e-22	9.81e-27	-4.59	SCARA5	scavenger receptor class A member 5
217504_at	4.37e-21	4e-25	-2.38	ABCA6	ATP binding cassette subfamily A member 6
235849_at	4.35e-20	5.57e-24	-4.34	SCARA5	scavenger receptor class A member 5
206262_at	2.77e-19	4.05e-23	-2.14	ADH1C	alcohol dehydrogenase 1C (class I), gamma polypeptide
203878_s_at	3e-19	4.94e-23	4.29	MMP11	matrix metallopeptidase 11
214078_at	3.8e-19	7.09e-23	-2.69	PAK3	p21 (RAC1) activated kinase 3
210511_s_at	3.8e-19	7.93e-23	3.92	INHBA	inhibin beta A subunit
222717_at	3.8e-19	8.34e-23	-3.57	SDPR	serum deprivation response
206742_at	4.44e-19	1.05e-22	-4.05	PIR-FIGF///FIGF	PIR-FIGF readthrough///c-fos induced growth factor
232555_at	5.96e-19	1.53e-22	-2.55	CREB5	cAMP responsive element binding protein 5
227183_at	7.71e-19	2.12e-22	-2.81	CARMN///MIR145	cardiac mesoderm enhancer-associated non-coding RNA///microRNA 145
203435_s_at	1.03e-18	3.01e-22	-3.12	MME	membrane metallo-endopeptidase
227140_at	1.48e-18	4.86e-22	3.52	INHBA	inhibin beta A subunit
212353_at	4.29e-18	1.49e-21	2.68	SULF1	sulfatase 1
37892_at	4.97e-18	1.82e-21	5.87	COL11A1	collagen type XI alpha 1 chain
204754_at	7.42e-18	2.85e-21	-2.49	HLF	HLF, PAR bZIP transcription factor
229310_at	8.54e-18	3.43e-21	-3.08	KLHL29	kelch like family member 29
204755_x_at	9.05e-18	3.81e-21	-2.97	HLF	HLF, PAR bZIP transcription factor
1556579_s_at	9.12e-18	4e-21	-2.49	IGSF10	immunoglobulin superfamily member 10
204320_at	1.37e-17	6.27e-21	5.23	COL11A1	collagen type XI alpha 1 chain
206093_x_at	2.09e-17	9.95e-21	-3.09	TNXB///TNXA	tenascin XB///tenascin XA (pseudogene)
229308_at	2.45e-17	1.21e-20	-2.1	ANKRD29	ankyrin repeat domain 29
219935_at	6.27e-17	3.21e-20	-2.96	ADAMTS5	ADAM metallopeptidase with thrombospondin type 1 motif 5
228885_at	6.76e-17	3.58e-20	-3.27	MAMDC2	MAM domain containing 2
232304_at	7e-17	3.87e-20	-2.28	PELI1	pellino E3 ubiquitin protein ligase 1
229802_at	7e-17	3.97e-20	3.33	WISP1	WNT1 inducible signaling pathway protein 1
216333_x_at	8.76e-17	5.13e-20	-3.47	TNXB///TNXA	tenascin XB///tenascin XA (pseudogene)
205713_s_at	9.68e-17	5.94e-20	4.3	COMP	cartilage oligomeric matrix protein
206825_at	9.68e-17	6.02e-20	-4.37	OXTR	oxytocin receptor
229357_at	1.1e-16	7.25e-20	-3.12	ADAMTS5	ADAM metallopeptidase with thrombospondin type 1 motif 5
228913_at	1.4e-16	9.47e-20	-2.17	TPT1-AS1	TPT1 antisense RNA 1
1558828_s_at	1.45e-16	1.02e-19	-3.16	CARMN	cardiac mesoderm enhancer-associated non-coding RNA
228434_at	1.45e-16	1.04e-19	-2.79	BTNL9	butyrophilin like 9
203881_s_at	1.51e-16	1.11e-19	-3.36	DMD	dystrophin
227529_s_at	2.14e-16	1.6e-19	-2.54	AKAP12	A-kinase anchoring protein 12
230670_at	2.4e-16	1.89e-19	-2.47	IGSF10	immunoglobulin superfamily member 10
213451_x_at	2.48e-16	2.03e-19	-3.33	TNXB///TNXA	tenascin XB///tenascin XA (pseudogene)
238577_s_at	2.55e-16	2.15e-19	-3.02	TSHZ2	teashirt zinc finger homeobox 2
201540_at	2.59e-16	2.27e-19	-2.37	FHL1	four and a half LIM domains 1
209774_x_at	3.19e-16	2.86e-19	-3.66	CXCL2	C-X-C motif chemokine ligand 2
204753_s_at	3.59e-16	3.36e-19	-2.93	HLF	HLF, PAR bZIP transcription factor
209763_at	3.59e-16	3.48e-19	-3.49	CHRDL1	chordin like 1
213661_at	3.91e-16	3.86e-19	-2.93	PAMR1	peptidase domain containing associated with muscle regeneration 1
219059_s_at	3.97e-16	4e-19	-3.58	LYVE1	lymphatic vessel endothelial hyaluronan receptor 1
212097_at	4.23e-16	4.33e-19	-2.03	CAV1	caveolin 1
219295_s_at	4.92e-16	5.21e-19	-3.31	PCOLCE2	procollagen C-endopeptidase enhancer 2
210299_s_at	6.59e-16	7.11e-19	-2.6	FHL1	four and a half LIM domains 1
213844_at	8.19e-16	8.98e-19	-3.12	HOXA5	homeobox A5
216918_s_at	8.53e-16	9.52e-19	-3.48	DST	dystonin
228665_at	8.63e-16	9.79e-19	-2.18	CYYR1	cysteine and tyrosine rich 1
204011_at	9.42e-16	1.09e-18	-2.32	SPRY2	sprouty RTK signaling antagonist 2
209613_s_at	9.61e-16	1.18e-18	-3.89	ADH1B	alcohol dehydrogenase 1B (class I), beta polypeptide
229201_at	1.07e-15	1.37e-18	-2.1	PAK3	p21 (RAC1) activated kinase 3
212354_at	1.42e-15	1.92e-18	2.38	SULF1	sulfatase 1
225575_at	1.54e-15	2.12e-18	-2.68	LIFR	leukemia inhibitory factor receptor alpha
214063_s_at	1.67e-15	2.39e-18	-3.4	TF	transferrin
220037_s_at	2.09e-15	3.1e-18	-3.35	LYVE1	lymphatic vessel endothelial hyaluronan receptor 1
210495_x_at	2.44e-15	3.7e-18	2.21	FN1	fibronectin 1
228368_at	2.45e-15	3.77e-18	-2.09	ARHGAP20	Rho GTPase activating protein 20
228268_at	2.64e-15	4.11e-18	-3.19	FMO2	flavin containing monooxygenase 2
204641_at	2.74e-15	4.32e-18	3.31	NEK2	NIMA related kinase 2
203434_s_at	2.83e-15	4.5e-18	-3.38	MME	membrane metallo-endopeptidase
1556427_s_at	3.31e-15	5.45e-18	-3.09	LRRN4CL	LRRN4 C-terminal like
1554547_at	3.31e-15	5.52e-18	-2.32	FAM13C	family with sequence similarity 13 member C
235616_at	3.52e-15	5.98e-18	-2.71	TSHZ2	teashirt zinc finger homeobox 2
216442_x_at	3.64e-15	6.32e-18	2.23	FN1	fibronectin 1
209614_at	4.01e-15	7.04e-18	-2.19	ADH1B	alcohol dehydrogenase 1B (class I), beta polypeptide
210052_s_at	4.38e-15	8.02e-18	3.18	TPX2	TPX2, microtubule nucleation factor
203400_s_at	4.38e-15	8.05e-18	-3.64	TF	transferrin
209218_at	4.38e-15	8.05e-18	2.09	SQLE	squalene epoxidase
219689_at	4.38e-15	8.09e-18	-2.48	SEMA3G	semaphorin 3G
43427_at	5.06e-15	9.44e-18	-2.78	ACACB	acetyl-CoA carboxylase beta
223623_at	5.43e-15	1.02e-17	-4.29	C2orf40	chromosome 2 open reading frame 40
242541_at	5.71e-15	1.09e-17	-2.13	ABCA9	ATP binding cassette subfamily A member 9
207961_x_at	5.85e-15	1.12e-17	-2.2	MYH11	myosin heavy chain 11
227530_at	6.08e-15	1.18e-17	-2.32	AKAP12	A-kinase anchoring protein 12
208609_s_at	6.21e-15	1.23e-17	-2.52	TNXB///TNXA	tenascin XB///tenascin XA (pseudogene)
225627_s_at	6.66e-15	1.33e-17	-2.33	CACHD1	cache domain containing 1
243140_at	7.25e-15	1.46e-17	-3.56	ACTA2	actin, alpha 2, smooth muscle, aorta
235521_at	7.7e-15	1.56e-17	-2.4	HOXA3	homeobox A3
49452_at	7.76e-15	1.59e-17	-3.02	ACACB	acetyl-CoA carboxylase beta
229568_at	8.82e-15	1.82e-17	-2.06	MOB3B	MOB kinase activator 3B
228653_at	1.3e-14	2.77e-17	-3.24	SAMD5	sterile alpha motif domain containing 5
212472_at	1.34e-14	2.93e-17	2.06	MICAL2	microtubule associated monooxygenase, calponin and LIM domain containing 2
211719_x_at	1.35e-14	2.97e-17	2.13	FN1	fibronectin 1
202746_at	1.5e-14	3.32e-17	-2.48	ITM2A	integral membrane protein 2A
212464_s_at	1.79e-14	4.1e-17	2.18	FN1	fibronectin 1
209863_s_at	1.81e-14	4.17e-17	-3.21	TP63	tumor protein p63
204455_at	1.9e-14	4.44e-17	-4.32	DST	dystonin
1558569_at	2.01e-14	4.77e-17	-2.32	LOC100131541	uncharacterized LOC100131541
226303_at	2.02e-14	4.87e-17	-2.15	PGM5	phosphoglucomutase 5
203323_at	2.22e-14	5.42e-17	-2.07	CAV2	caveolin 2
235368_at	2.22e-14	5.44e-17	-2.82	ADAMTS5	ADAM metallopeptidase with thrombospondin type 1 motif 5
221841_s_at	2.3e-14	5.72e-17	-2.06	KLF4	Kruppel like factor 4
221795_at	2.32e-14	5.81e-17	-3.94	NTRK2	neurotrophic receptor tyrosine kinase 2
236359_at	2.52e-14	6.42e-17	-2.41	SCN4B	sodium voltage-gated channel beta subunit 4
202954_at	3.17e-14	8.29e-17	2.67	UBE2C	ubiquitin conjugating enzyme E2 C
204719_at	3.27e-14	8.67e-17	-3.54	ABCA8	ATP binding cassette subfamily A member 8
218974_at	3.56e-14	9.71e-17	-2.07	SOBP	sine oculis binding protein homolog
241789_at	3.68e-14	1.01e-16	-2.03	RBMS3	RNA binding motif single stranded interacting protein 3
209894_at	3.96e-14	1.11e-16	-2.69	LEPROT///LEPR	leptin receptor overlapping transcript///leptin receptor
227646_at	4.28e-14	1.21e-16	-2.49	EBF1	early B-cell factor 1
221796_at	4.51e-14	1.29e-16	-4.13	NTRK2	neurotrophic receptor tyrosine kinase 2
239185_at	4.66e-14	1.35e-16	-2.12	ABCA9	ATP binding cassette subfamily A member 9
209612_s_at	5.21e-14	1.52e-16	-3.88	ADH1B	alcohol dehydrogenase 1B (class I), beta polypeptide
207092_at	5.22e-14	1.53e-16	-3.55	LEP	leptin
218355_at	5.7e-14	1.69e-16	2.73	KIF4A	kinesin family member 4A
228335_at	5.84e-14	1.74e-16	-2.84	CLDN11	claudin 11
223278_at	6.2e-14	1.86e-16	3.64	GJB2	gap junction protein beta 2
212344_at	6.22e-14	1.88e-16	2.5	SULF1	sulfatase 1
232204_at	6.39e-14	1.94e-16	-2.22	EBF1	early B-cell factor 1
227006_at	6.57e-14	2.02e-16	-2.59	PPP1R14A	protein phosphatase 1 regulatory inhibitor subunit 14A
218585_s_at	7.35e-14	2.27e-16	2.57	DTL	denticleless E3 ubiquitin protein ligase homolog
230624_at	7.93e-14	2.48e-16	-2.05	SLC25A27	solute carrier family 25 member 27
202503_s_at	7.97e-14	2.51e-16	2.53	KIAA0101	KIAA0101
205034_at	8.14e-14	2.58e-16	2.68	CCNE2	cyclin E2
218087_s_at	8.48e-14	2.7e-16	-2.46	SORBS1	sorbin and SH3 domain containing 1
206481_s_at	8.91e-14	2.86e-16	-2.17	LDB2	LIM domain binding 2
223541_at	8.91e-14	2.89e-16	-2.46	HAS3	hyaluronan synthase 3
209773_s_at	8.91e-14	2.9e-16	3.74	RRM2	ribonucleotide reductase regulatory subunit M2
225571_at	8.91e-14	2.91e-16	-2.93	LIFR	leukemia inhibitory factor receptor alpha
235978_at	1.03e-13	3.39e-16	-3.09	FABP4	fatty acid binding protein 4
218009_s_at	1.08e-13	3.69e-16	2.61	PRC1	protein regulator of cytokinesis 1
229985_at	1.11e-13	3.81e-16	-2.42	BTNL9	butyrophilin like 9
223229_at	1.11e-13	3.83e-16	2.92	UBE2T	ubiquitin conjugating enzyme E2 T
227705_at	1.12e-13	3.9e-16	-2.69	TCEAL7	transcription elongation factor A like 7
209283_at	1.17e-13	4.12e-16	-2.91	CRYAB	crystallin alpha B
224027_at	1.17e-13	4.14e-16	-3.87	CCL28	C-C motif chemokine ligand 28
209842_at	1.33e-13	4.73e-16	-3.4	SOX10	SRY-box 10
238750_at	1.35e-13	4.83e-16	-3.65	CCL28	C-C motif chemokine ligand 28
230425_at	1.49e-13	5.42e-16	-2.5	EPHB1	EPH receptor B1
231773_at	1.49e-13	5.46e-16	-2.68	ANGPTL1	angiopoietin like 1
202705_at	1.57e-13	5.84e-16	2.59	CCNB2	cyclin B2
211726_s_at	1.6e-13	6.01e-16	-2.92	FMO2	flavin containing monooxygenase 2
207828_s_at	1.6e-13	6.05e-16	2.6	CENPF	centromere protein F
209686_at	1.74e-13	6.7e-16	-2.81	S100B	S100 calcium binding protein B
202747_s_at	2.08e-13	8.22e-16	-2.16	ITM2A	integral membrane protein 2A
206201_s_at	2.15e-13	8.58e-16	-2.56	MEOX2	mesenchyme homeobox 2
243940_at	2.17e-13	8.69e-16	-2.06	TSHZ2	teashirt zinc finger homeobox 2
207808_s_at	2.18e-13	8.77e-16	-2.08	PROS1	protein S (alpha)
235017_s_at	2.2e-13	8.89e-16	-2.32	CSRNP3	cysteine and serine rich nuclear protein 3
206170_at	2.31e-13	9.41e-16	-2.11	ADRB2	adrenoceptor beta 2
203851_at	2.39e-13	9.78e-16	-2.46	IGFBP6	insulin like growth factor binding protein 6
202555_s_at	2.43e-13	1e-15	-2.21	MYLK	myosin light chain kinase
238049_at	3.04e-13	1.28e-15	-2.08	GRAMD3	GRAM domain containing 3
205612_at	3.06e-13	1.3e-15	-2.43	MMRN1	multimerin 1
212730_at	3.09e-13	1.32e-15	-3.79	SYNM	synemin
213029_at	3.09e-13	1.32e-15	-2.05	NFIB	nuclear factor I B
209074_s_at	3.37e-13	1.45e-15	-2.95	FAM107A	family with sequence similarity 107 member A
205200_at	3.38e-13	1.46e-15	-3.44	EXOSC7///CLEC3B	exosome component 7///C-type lectin domain family 3 member B
203549_s_at	3.41e-13	1.48e-15	-3.14	LPL	lipoprotein lipase
225655_at	3.41e-13	1.48e-15	2.39	UHRF1	ubiquitin like with PHD and ring finger domains 1
214710_s_at	3.6e-13	1.57e-15	2.57	CCNB1	cyclin B1
205384_at	3.78e-13	1.67e-15	-2.89	FXYD1	FXYD domain containing ion transport regulator 1
202338_at	3.92e-13	1.75e-15	2.18	TK1	thymidine kinase 1
225990_at	4e-13	1.79e-15	-2.13	BOC	BOC cell adhesion associated, oncogene regulated
219064_at	4.24e-13	1.92e-15	-2.75	ITIH5	inter-alpha-trypsin inhibitor heavy chain family member 5
201292_at	4.33e-13	1.97e-15	2.86	TOP2A	topoisomerase (DNA) II alpha
218039_at	4.56e-13	2.09e-15	2.49	NUSAP1	nucleolar and spindle associated protein 1
206453_s_at	5.04e-13	2.33e-15	-2.72	NDRG2	NDRG family member 2
228376_at	5.19e-13	2.42e-15	-2.12	GGTA1P	glycoprotein, alpha-galactosyltransferase 1 pseudogene
230378_at	5.36e-13	2.51e-15	-5	SCGB3A1	secretoglobin family 3A member 1
222680_s_at	5.37e-13	2.52e-15	2.36	DTL	denticleless E3 ubiquitin protein ligase homolog
235489_at	5.53e-13	2.61e-15	-2.24	RHOJ	ras homolog family member J
209821_at	6.27e-13	3e-15	-2.84	IL33	interleukin 33
229011_at	6.27e-13	3e-15	-2.06	EMP1	epithelial membrane protein 1
228729_at	6.78e-13	3.29e-15	2.37	CCNB1	cyclin B1
236044_at	6.98e-13	3.41e-15	2.98	PLPP4	phospholipid phosphatase 4
231987_at	7.09e-13	3.48e-15	-2.24	CARMN	cardiac mesoderm enhancer-associated non-coding RNA
204591_at	7.34e-13	3.62e-15	-2.47	CHL1	cell adhesion molecule L1 like
213577_at	8.33e-13	4.13e-15	2.33	SQLE	squalene epoxidase
228186_s_at	8.68e-13	4.35e-15	-2.31	RSPO3	R-spondin 3
203554_x_at	8.84e-13	4.45e-15	2.21	PTTG1	pituitary tumor-transforming 1
228195_at	8.9e-13	4.49e-15	-2.46	C2orf88	chromosome 2 open reading frame 88
204092_s_at	9.3e-13	4.73e-15	2.1	AURKA	aurora kinase A
203065_s_at	9.4e-13	4.8e-15	-2.02	CAV1	caveolin 1
225424_at	9.48e-13	4.87e-15	-2.53	GPAM	glycerol-3-phosphate acyltransferase, mitochondrial
214680_at	1.01e-12	5.25e-15	-3.17	NTRK2	neurotrophic receptor tyrosine kinase 2
219918_s_at	1.02e-12	5.35e-15	3	ASPM	abnormal spindle microtubule assembly
218542_at	1.05e-12	5.55e-15	2.45	CEP55	centrosomal protein 55
204271_s_at	1.12e-12	5.94e-15	-2.25	EDNRB	endothelin receptor type B
238909_at	1.12e-12	5.98e-15	-2.27	S100A10	S100 calcium binding protein A10
204825_at	1.23e-12	6.65e-15	2.38	MELK	maternal embryonic leucine zipper kinase
229127_at	1.24e-12	6.71e-15	-2.2	JAM2	junctional adhesion molecule 2
214598_at	1.26e-12	6.82e-15	-3.77	CLDN8	claudin 8
225687_at	1.29e-12	7.08e-15	2.89	FAM83D	family with sequence similarity 83 member D
201496_x_at	1.51e-12	8.3e-15	-2.25	MYH11	myosin heavy chain 11
227771_at	1.53e-12	8.51e-15	-2.11	LIFR	leukemia inhibitory factor receptor alpha
229487_at	1.61e-12	9.07e-15	-2.11	EBF1	early B-cell factor 1
203213_at	1.63e-12	9.25e-15	2.18	CDK1	cyclin dependent kinase 1
201497_x_at	1.63e-12	9.26e-15	-2.99	MYH11	myosin heavy chain 11
226625_at	1.72e-12	9.8e-15	-2.91	TGFBR3	transforming growth factor beta receptor 3
227874_at	1.74e-12	9.95e-15	-2.11	EMCN	endomucin
221928_at	1.78e-12	1.03e-14	-2.03	ACACB	acetyl-CoA carboxylase beta
204422_s_at	1.79e-12	1.04e-14	-2.09	FGF2	fibroblast growth factor 2
203766_s_at	1.98e-12	1.15e-14	-2.7	LMOD1	leiomodin 1
203755_at	2.11e-12	1.25e-14	2.52	BUB1B	BUB1 mitotic checkpoint serine/threonine kinase B
209292_at	2.21e-12	1.34e-14	-3.17	ID4	inhibitor of DNA binding 4, HLH protein
228255_at	2.28e-12	1.38e-14	-2.2	TMEM237	transmembrane protein 237
227145_at	2.29e-12	1.4e-14	-2.04	LOXL4	lysyl oxidase like 4
201291_s_at	2.59e-12	1.6e-14	3.22	TOP2A	topoisomerase (DNA) II alpha
201890_at	2.64e-12	1.64e-14	2.88	RRM2	ribonucleotide reductase regulatory subunit M2
227826_s_at	2.79e-12	1.74e-14	-2.64	SORBS2	sorbin and SH3 domain containing 2
205051_s_at	3.01e-12	1.9e-14	-3.31	KIT	KIT proto-oncogene receptor tyrosine kinase
208079_s_at	3.03e-12	1.92e-14	2.62	AURKA	aurora kinase A
225681_at	3.3e-12	2.14e-14	2.11	CTHRC1	collagen triple helix repeat containing 1
209220_at	3.42e-12	2.23e-14	-2.71	GPC3	glypican 3
227827_at	3.57e-12	2.34e-14	-2.43	SORBS2	sorbin and SH3 domain containing 2
224240_s_at	3.57e-12	2.35e-14	-2.86	CCL28	C-C motif chemokine ligand 28
222608_s_at	3.6e-12	2.38e-14	2.87	ANLN	anillin actin binding protein
203876_s_at	3.95e-12	2.64e-14	3.02	MMP11	matrix metallopeptidase 11
224999_at	4.08e-12	2.77e-14	-2.32	EGFR	epidermal growth factor receptor
235746_s_at	4.58e-12	3.17e-14	-2.2	PLA2R1	phospholipase A2 receptor 1
203980_at	4.58e-12	3.18e-14	-3.07	FABP4	fatty acid binding protein 4
205382_s_at	4.81e-12	3.36e-14	-2.91	CFD	complement factor D
210559_s_at	5.46e-12	3.89e-14	2.61	CDK1	cyclin dependent kinase 1
205259_at	5.54e-12	3.96e-14	-2.26	NR3C2	nuclear receptor subfamily 3 group C member 2
217546_at	6.13e-12	4.44e-14	-2.83	MT1M	metallothionein 1M
206163_at	6.44e-12	4.7e-14	-2.28	MIR548F5///MAB21L1	microRNA 548f-5///mab-21 like 1
1564796_at	6.48e-12	4.74e-14	-2.5	EMP1	epithelial membrane protein 1
203951_at	6.93e-12	5.09e-14	-2.57	CNN1	calponin 1
220276_at	7.59e-12	5.62e-14	-2.47	RERGL	RERG like
202095_s_at	7.89e-12	5.9e-14	2.86	BIRC5	baculoviral IAP repeat containing 5
231766_s_at	8.48e-12	6.39e-14	2.79	COL12A1	collagen type XII alpha 1 chain
214505_s_at	9e-12	6.83e-14	-2.35	FHL1	four and a half LIM domains 1
223381_at	9.04e-12	6.9e-14	2.19	NUF2	NUF2, NDC80 kinetochore complex component
228409_at	9.27e-12	7.1e-14	-2.65	PLIN4	perilipin 4
218736_s_at	9.67e-12	7.45e-14	-2.32	PALMD	palmdelphin
227875_at	9.72e-12	7.5e-14	-3.13	KLHL13	kelch like family member 13
205923_at	9.88e-12	7.64e-14	-2.16	RELN	reelin
210298_x_at	1.01e-11	7.83e-14	-2.39	FHL1	four and a half LIM domains 1
217755_at	1.01e-11	7.9e-14	2	HN1	hematological and neurological expressed 1
223468_s_at	1.08e-11	8.49e-14	-2.04	RGMA	repulsive guidance molecule family member a
219230_at	1.26e-11	1e-13	-2.53	TMEM100	transmembrane protein 100
214651_s_at	1.29e-11	1.04e-13	-2.51	HOXA10-HOXA9///MIR196B///HOXA9	HOXA10-HOXA9 readthrough///microRNA 196b///homeobox A9
209169_at	1.34e-11	1.08e-13	-2.69	GPM6B	glycoprotein M6B
221558_s_at	1.43e-11	1.17e-13	2.06	LEF1	lymphoid enhancer binding factor 1
235355_at	1.43e-11	1.18e-13	-2.7	CSRNP3	cysteine and serine rich nuclear protein 3
209714_s_at	1.48e-11	1.22e-13	2.32	CDKN3	cyclin dependent kinase inhibitor 3
226147_s_at	1.69e-11	1.43e-13	-4.4	PIGR	polymeric immunoglobulin receptor
209167_at	1.71e-11	1.45e-13	-2.59	GPM6B	glycoprotein M6B
235570_at	1.76e-11	1.5e-13	-2.24	RBMS3	RNA binding motif single stranded interacting protein 3
213258_at	1.87e-11	1.61e-13	-2.1	TFPI	tissue factor pathway inhibitor
225016_at	1.9e-11	1.65e-13	-2.38	APCDD1	APC down-regulated 1
201539_s_at	1.91e-11	1.66e-13	-2.36	FHL1	four and a half LIM domains 1
212768_s_at	1.92e-11	1.67e-13	-3.53	OLFM4	olfactomedin 4
218711_s_at	2.13e-11	1.88e-13	-2.32	SDPR	serum deprivation response
205700_at	2.27e-11	2.04e-13	2.01	HSD17B6	hydroxysteroid 17-beta dehydrogenase 6
223307_at	2.34e-11	2.12e-13	2.12	CDCA3	cell division cycle associated 3
213909_at	2.34e-11	2.12e-13	3.32	LRRC15	leucine rich repeat containing 15
203214_x_at	2.34e-11	2.13e-13	2.62	CDK1	cyclin dependent kinase 1
204955_at	2.44e-11	2.23e-13	-2.28	SRPX	sushi repeat containing protein, X-linked
227419_x_at	2.44e-11	2.24e-13	-2.67	PLAC9	placenta specific 9
207165_at	2.44e-11	2.24e-13	2.12	HMMR	hyaluronan mediated motility receptor
205044_at	2.54e-11	2.36e-13	-4.33	GABRP	gamma-aminobutyric acid type A receptor pi subunit
219093_at	2.55e-11	2.38e-13	-2.11	PID1	phosphotyrosine interaction domain containing 1
205913_at	2.86e-11	2.73e-13	-3.64	PLIN1	perilipin 1
218755_at	2.86e-11	2.74e-13	2.25	KIF20A	kinesin family member 20A
203548_s_at	2.9e-11	2.78e-13	-3.26	LPL	lipoprotein lipase
235182_at	3.02e-11	2.9e-13	-2.27	ISM1	isthmin 1, angiogenesis inhibitor
228766_at	3.12e-11	3.03e-13	-3.25	CD36	CD36 molecule
209408_at	3.14e-11	3.06e-13	2.12	KIF2C	kinesin family member 2C
204154_at	3.2e-11	3.13e-13	-2.6	CDO1	cysteine dioxygenase type 1
202350_s_at	3.2e-11	3.14e-13	-2.82	LOC100506558///MATN2	uncharacterized LOC100506558///matrilin 2
202274_at	3.23e-11	3.17e-13	-3.1	ACTG2	actin, gamma 2, smooth muscle, enteric
220266_s_at	3.23e-11	3.18e-13	-2.28	KLF4	Kruppel like factor 4
226933_s_at	3.26e-11	3.22e-13	-2.63	ID4	inhibitor of DNA binding 4, HLH protein
207480_s_at	3.41e-11	3.4e-13	-2.11	MEIS2	Meis homeobox 2
201983_s_at	3.57e-11	3.58e-13	-2.45	EGFR	epidermal growth factor receptor
206243_at	3.78e-11	3.8e-13	-2.51	TIMP4	TIMP metallopeptidase inhibitor 4
220625_s_at	4.14e-11	4.21e-13	-3.96	ELF5	E74 like ETS transcription factor 5
204273_at	4.25e-11	4.34e-13	-2.5	EDNRB	endothelin receptor type B
208607_s_at	4.27e-11	4.39e-13	-3.05	SAA2-SAA4///SAA2///SAA1	SAA2-SAA4 readthrough///serum amyloid A2///serum amyloid A1
238066_at	4.38e-11	4.53e-13	-2.4	RBP7	retinol binding protein 7
211696_x_at	4.45e-11	4.62e-13	-2.32	HBB	hemoglobin subunit beta
223168_at	4.46e-11	4.64e-13	-2.02	RHOU	ras homolog family member U
218730_s_at	4.71e-11	4.97e-13	-3.01	OGN	osteoglycin
220425_x_at	5.24e-11	5.59e-13	-3.7	ROPN1B	rhophilin associated tail protein 1B
213706_at	5.62e-11	6.04e-13	-2.48	GPD1	glycerol-3-phosphate dehydrogenase 1
229302_at	5.76e-11	6.22e-13	-2.68	TMEM178A	transmembrane protein 178A
224191_x_at	5.82e-11	6.31e-13	-3.5	ROPN1	rhophilin associated tail protein 1
231535_x_at	5.86e-11	6.37e-13	-3.46	ROPN1	rhophilin associated tail protein 1
203180_at	6.04e-11	6.59e-13	-2.18	ALDH1A3	aldehyde dehydrogenase 1 family member A3
230472_at	7.57e-11	8.57e-13	-2.98	IRX1	iroquois homeobox 1
222862_s_at	7.81e-11	8.87e-13	-2.7	AK5	adenylate kinase 5
222155_s_at	7.86e-11	8.94e-13	2.27	SLC52A2	solute carrier family 52 member 2
213900_at	8.04e-11	9.19e-13	-2.64	FAM189A2	family with sequence similarity 189 member A2
225354_s_at	8.26e-11	9.51e-13	-2.39	SH3BGRL2	SH3 domain binding glutamate rich protein like 2
217232_x_at	8.26e-11	9.53e-13	-2.43	HBB	hemoglobin subunit beta
203296_s_at	9.12e-11	1.07e-12	-2.27	ATP1A2	ATPase Na+/K+ transporting subunit alpha 2
225601_at	9.26e-11	1.08e-12	2.07	HMGB3	high mobility group box 3
235044_at	9.36e-11	1.1e-12	-2.33	CYYR1	cysteine and tyrosine rich 1
823_at	9.95e-11	1.17e-12	-2.71	CX3CL1	C-X3-C motif chemokine ligand 1
209948_at	1.01e-10	1.2e-12	-2.14	KCNMB1	potassium calcium-activated channel subfamily M regulatory beta subunit 1
207175_at	1.01e-10	1.2e-12	-3.43	ADIPOQ	adiponectin, C1Q and collagen domain containing
202965_s_at	1.16e-10	1.4e-12	-2.66	CAPN6	calpain 6
218782_s_at	1.22e-10	1.48e-12	2.17	ATAD2	ATPase family, AAA domain containing 2
203358_s_at	1.25e-10	1.52e-12	2.22	EZH2	enhancer of zeste 2 polycomb repressive complex 2 subunit
219140_s_at	1.25e-10	1.52e-12	-3.07	RBP4	retinol binding protein 4
235463_s_at	1.26e-10	1.54e-12	2.19	CERS6	ceramide synthase 6
210387_at	1.29e-10	1.57e-12	3.18	HIST1H2BJ///HIST1H2BG	histone cluster 1, H2bj///histone cluster 1, H2bg
205478_at	1.39e-10	1.72e-12	-2.51	PPP1R1A	protein phosphatase 1 regulatory inhibitor subunit 1A
204962_s_at	1.5e-10	1.88e-12	2.46	SLC35F6///CENPA	solute carrier family 35 member F6///centromere protein A
209116_x_at	1.5e-10	1.89e-12	-2.53	HBB	hemoglobin subunit beta
202037_s_at	1.51e-10	1.91e-12	-3.94	SFRP1	secreted frizzled related protein 1
219213_at	1.54e-10	1.94e-12	-2.07	JAM2	junctional adhesion molecule 2
212021_s_at	1.56e-10	1.98e-12	2.14	MKI67	marker of proliferation Ki-67
228399_at	1.66e-10	2.12e-12	-2.32	OSR1	odd-skipped related transciption factor 1
209170_s_at	1.75e-10	2.24e-12	-2.6	GPM6B	glycoprotein M6B
203687_at	1.85e-10	2.38e-12	-2.35	CX3CL1	C-X3-C motif chemokine ligand 1
202242_at	1.91e-10	2.48e-12	-2.36	TSPAN7	tetraspanin 7
225720_at	1.96e-10	2.56e-12	-2.29	SYNPO2	synaptopodin 2
210170_at	2.14e-10	2.81e-12	-2.64	PDLIM3	PDZ and LIM domain 3
202861_at	2.18e-10	2.88e-12	-2.01	MIR6883///PER1	microRNA 6883///period circadian clock 1
222722_at	2.3e-10	3.05e-12	-3.08	OGN	osteoglycin
206102_at	2.39e-10	3.2e-12	2.1	GINS1	GINS complex subunit 1
204731_at	2.56e-10	3.44e-12	-2.84	TGFBR3	transforming growth factor beta receptor 3
226237_at	2.59e-10	3.5e-12	2.48	COL8A1	collagen type VIII alpha 1 chain
209168_at	2.59e-10	3.51e-12	-2.3	GPM6B	glycoprotein M6B
214456_x_at	2.83e-10	3.89e-12	-2.71	SAA2///SAA1	serum amyloid A2///serum amyloid A1
219398_at	2.86e-10	3.94e-12	-2.21	CIDEC	cell death inducing DFFA like effector c
213456_at	2.94e-10	4.06e-12	-3.35	SOSTDC1	sclerostin domain containing 1
219564_at	2.95e-10	4.09e-12	-2.31	KCNJ16	potassium voltage-gated channel subfamily J member 16
204858_s_at	3.03e-10	4.21e-12	2.08	TYMP	thymidine phosphorylase
202036_s_at	3.28e-10	4.64e-12	-3.98	SFRP1	secreted frizzled related protein 1
204437_s_at	3.32e-10	4.71e-12	-3.08	FOLR1	folate receptor 1
202856_s_at	4.3e-10	6.29e-12	2.4	MIR6787///SLC16A3	microRNA 6787///solute carrier family 16 member 3
231879_at	4.38e-10	6.43e-12	2.53	COL12A1	collagen type XII alpha 1 chain
222162_s_at	4.54e-10	6.71e-12	-2.05	ADAMTS1	ADAM metallopeptidase with thrombospondin type 1 motif 1
228827_at	5.11e-10	7.73e-12	-2.14	RUNX1T1	RUNX1 translocation partner 1
209291_at	5.15e-10	7.82e-12	-2.62	ID4	inhibitor of DNA binding 4, HLH protein
205392_s_at	5.17e-10	7.86e-12	-2.78	CCL15-CCL14///CCL14	CCL15-CCL14 readthrough (NMD candidate)///C-C motif chemokine ligand 14
203108_at	5.35e-10	8.18e-12	2.9	GPRC5A	G protein-coupled receptor class C group 5 member A
204351_at	5.42e-10	8.32e-12	4.52	S100P	S100 calcium binding protein P
238018_at	5.53e-10	8.57e-12	-2.35	FAM150B	family with sequence similarity 150 member B
1555758_a_at	6.04e-10	9.48e-12	2.5	CDKN3	cyclin dependent kinase inhibitor 3
226322_at	7.42e-10	1.21e-11	-2.3	TMTC1	transmembrane and tetratricopeptide repeat containing 1
212741_at	8.17e-10	1.34e-11	-2.69	MAOA	monoamine oxidase A
213032_at	8.36e-10	1.38e-11	-2.02	NFIB	nuclear factor I B
201820_at	8.59e-10	1.42e-11	-3.38	KRT5	keratin 5
216950_s_at	8.81e-10	1.46e-11	2.22	FCGR1CP///FCGR1B///FCGR1A	Fc fragment of IgG receptor Ic, pseudogene///Fc fragment of IgG receptor Ib///Fc fragment of IgG receptor Ia
202768_at	8.84e-10	1.47e-11	-3.1	FOSB	FosB proto-oncogene, AP-1 transcription factor subunit
204033_at	9.87e-10	1.66e-11	2.27	TRIP13	thyroid hormone receptor interactor 13
203764_at	1.05e-09	1.8e-11	2.09	DLGAP5	DLG associated protein 5
211685_s_at	1.1e-09	1.88e-11	-2.34	NCALD	neurocalcin delta
214414_x_at	1.16e-09	2e-11	-2.23	HBA2///HBA1	hemoglobin subunit alpha 2///hemoglobin subunit alpha 1
206157_at	1.28e-09	2.24e-11	-2.48	PTX3	pentraxin 3
1552848_a_at	1.29e-09	2.27e-11	-2.71	PTCHD1	patched domain containing 1
209875_s_at	1.38e-09	2.45e-11	2.5	SPP1	secreted phosphoprotein 1
205363_at	1.54e-09	2.76e-11	-3.44	BBOX1	gamma-butyrobetaine hydroxylase 1
202920_at	1.88e-09	3.46e-11	-2.43	ANK2	ankyrin 2, neuronal
204734_at	1.99e-09	3.69e-11	-3.53	KRT15	keratin 15
203726_s_at	2.06e-09	3.84e-11	-2.94	LAMA3	laminin subunit alpha 3
209351_at	2.17e-09	4.11e-11	-3.91	KRT14	keratin 14
209642_at	2.31e-09	4.45e-11	2.04	BUB1	BUB1 mitotic checkpoint serine/threonine kinase
225207_at	2.35e-09	4.55e-11	-2.51	PDK4	pyruvate dehydrogenase kinase 4
203936_s_at	2.35e-09	4.56e-11	2.68	MMP9	matrix metallopeptidase 9
205483_s_at	2.37e-09	4.59e-11	2.18	ISG15	ISG15 ubiquitin-like modifier
227997_at	2.42e-09	4.71e-11	-2.19	IL17RD	interleukin 17 receptor D
215028_at	2.53e-09	4.99e-11	-2.11	SEMA6A	semaphorin 6A
214511_x_at	2.57e-09	5.07e-11	2.01	FCGR1B	Fc fragment of IgG receptor Ib
205117_at	2.96e-09	5.93e-11	-2.05	FGF1	fibroblast growth factor 1
205597_at	3.06e-09	6.16e-11	2.9	SLC44A4	solute carrier family 44 member 4
202035_s_at	3.06e-09	6.16e-11	-3.2	SFRP1	secreted frizzled related protein 1
209955_s_at	3.17e-09	6.42e-11	2	FAP	fibroblast activation protein alpha
210664_s_at	3.49e-09	7.16e-11	-2.1	TFPI	tissue factor pathway inhibitor
219308_s_at	3.83e-09	7.93e-11	-2.29	AK5	adenylate kinase 5
205782_at	3.84e-09	7.95e-11	-2.04	FGF7	fibroblast growth factor 7
227662_at	4.07e-09	8.47e-11	-2.19	SYNPO2	synaptopodin 2
204388_s_at	4.16e-09	8.69e-11	-2.13	MAOA	monoamine oxidase A
229800_at	4.23e-09	8.88e-11	-2.23	DCLK1	doublecortin like kinase 1
204151_x_at	4.6e-09	9.75e-11	-2.38	AKR1C1	aldo-keto reductase family 1 member C1
211745_x_at	5.47e-09	1.19e-10	-2.29	HBA2///HBA1	hemoglobin subunit alpha 2///hemoglobin subunit alpha 1
217414_x_at	6.39e-09	1.42e-10	-2.4	HBA2///HBA1	hemoglobin subunit alpha 2///hemoglobin subunit alpha 1
213071_at	6.93e-09	1.57e-10	-2.26	DPT	dermatopontin
209699_x_at	6.98e-09	1.58e-10	-2.64	LOC101930400///AKR1C2	aldo-keto reductase family 1 member C2-like///aldo-keto reductase family 1, member C2
205883_at	6.99e-09	1.59e-10	-2.37	ZBTB16	zinc finger and BTB domain containing 16
204822_at	7.1e-09	1.62e-10	2.25	TTK	TTK protein kinase
226961_at	7.18e-09	1.64e-10	2.05	PRR15	proline rich 15
211699_x_at	7.29e-09	1.67e-10	-2.28	HBA2///HBA1	hemoglobin subunit alpha 2///hemoglobin subunit alpha 1
230418_s_at	7.35e-09	1.69e-10	-2.21	GALNT16	polypeptide N-acetylgalactosaminyltransferase 16
219978_s_at	8.02e-09	1.88e-10	2.25	NUSAP1	nucleolar and spindle associated protein 1
204533_at	8.42e-09	1.98e-10	2.81	CXCL10	C-X-C motif chemokine ligand 10
209458_x_at	9.09e-09	2.16e-10	-2.32	HBA2///HBA1	hemoglobin subunit alpha 2///hemoglobin subunit alpha 1
204018_x_at	9.88e-09	2.4e-10	-2.26	HBA2///HBA1	hemoglobin subunit alpha 2///hemoglobin subunit alpha 1
1552519_at	9.95e-09	2.42e-10	-2.03	ACVR1C	activin A receptor type 1C
202888_s_at	1.06e-08	2.6e-10	-2.13	ANPEP	alanyl aminopeptidase, membrane
203418_at	1.12e-08	2.77e-10	2.01	CCNA2	cyclin A2
205030_at	1.2e-08	2.96e-10	-3.54	FABP7	fatty acid binding protein 7
215779_s_at	1.21e-08	3.02e-10	2.34	HIST1H2BJ///HIST1H2BG	histone cluster 1, H2bj///histone cluster 1, H2bg
204972_at	1.26e-08	3.14e-10	2.03	OAS2	2'-5'-oligoadenylate synthetase 2
219545_at	1.59e-08	4.05e-10	-2.3	NDUFC2-KCTD14///KCTD14	NDUFC2-KCTD14 readthrough///potassium channel tetramerization domain containing 14
58916_at	1.74e-08	4.53e-10	-2.48	NDUFC2-KCTD14///KCTD14	NDUFC2-KCTD14 readthrough///potassium channel tetramerization domain containing 14
213800_at	1.88e-08	4.92e-10	-2.1	CFH	complement factor H
226791_at	2.05e-08	5.45e-10	2.09	KIFC2	kinesin family member C2
202870_s_at	2.1e-08	5.58e-10	2.31	CDC20	cell division cycle 20
228750_at	2.1e-08	5.58e-10	-2.67	COL14A1	collagen type XIV alpha 1 chain
211653_x_at	2.22e-08	5.95e-10	-2.02	LOC101930400///AKR1C2	aldo-keto reductase family 1 member C2-like///aldo-keto reductase family 1, member C2
219148_at	2.35e-08	6.36e-10	2.21	PBK	PDZ binding kinase
218468_s_at	2.35e-08	6.37e-10	2.33	GREM1	gremlin 1, DAN family BMP antagonist
219795_at	2.86e-08	7.88e-10	-3	SLC6A14	solute carrier family 6 member 14
209398_at	2.92e-08	8.07e-10	2	HIST1H1C	histone cluster 1, H1c
206488_s_at	3.08e-08	8.57e-10	-2.79	CD36	CD36 molecule
209465_x_at	3.17e-08	8.87e-10	-2.79	PTN	pleiotrophin
213524_s_at	3.21e-08	9.01e-10	-2.18	G0S2	G0/G1 switch 2
205498_at	3.51e-08	9.95e-10	-2.11	GHR	growth hormone receptor
204678_s_at	3.68e-08	1.05e-09	2.02	KCNK1	potassium two pore domain channel subfamily K member 1
208335_s_at	3.72e-08	1.06e-09	-2.76	ACKR1	atypical chemokine receptor 1 (Duffy blood group)
230867_at	4.09e-08	1.18e-09	-2.31	COL6A6	collagen type VI alpha 6 chain
204748_at	4.88e-08	1.44e-09	-2.49	PTGS2	prostaglandin-endoperoxide synthase 2
211737_x_at	5.07e-08	1.51e-09	-2.84	PTN	pleiotrophin
209541_at	6.21e-08	1.88e-09	-2.16	IGF1	insulin like growth factor 1
209555_s_at	6.63e-08	2.02e-09	-2.78	CD36	CD36 molecule
206115_at	6.66e-08	2.03e-09	-2.07	EGR3	early growth response 3
209540_at	7.31e-08	2.26e-09	-2.15	IGF1	insulin like growth factor 1
204606_at	9.46e-08	3.02e-09	-2.11	CCL21	C-C motif chemokine ligand 21
204712_at	9.74e-08	3.12e-09	-3.26	WIF1	WNT inhibitory factor 1
206560_s_at	9.98e-08	3.21e-09	-2.26	MIA	melanoma inhibitory activity
206134_at	1.03e-07	3.33e-09	2.74	ADAMDEC1	ADAM like decysin 1
228347_at	1.09e-07	3.55e-09	2.51	SIX1	SIX homeobox 1
205943_at	1.12e-07	3.63e-09	2.35	TDO2	tryptophan 2,3-dioxygenase
236496_at	1.5e-07	5.11e-09	2.17	DEGS2	delta 4-desaturase, sphingolipid 2
209466_x_at	1.55e-07	5.34e-09	-2.53	PTN	pleiotrophin
227238_at	2.09e-07	7.44e-09	-2.34	MUC15	mucin 15, cell surface associated
204415_at	2.16e-07	7.73e-09	2.34	IFI6	interferon alpha inducible protein 6
204475_at	2.17e-07	7.78e-09	3.13	MMP1	matrix metallopeptidase 1
220624_s_at	2.18e-07	7.85e-09	-2.53	ELF5	E74 like ETS transcription factor 5
212713_at	3.01e-07	1.14e-08	-2.38	MFAP4	microfibrillar associated protein 4
225420_at	3.02e-07	1.15e-08	-2.06	GPAM	glycerol-3-phosphate acyltransferase, mitochondrial
211122_s_at	3.42e-07	1.32e-08	2.68	CXCL11	C-X-C motif chemokine ligand 11
205157_s_at	4.17e-07	1.64e-08	-2.85	KRT17///JUP	keratin 17///junction plakoglobin
226930_at	4.61e-07	1.85e-08	2.12	FNDC1	fibronectin type III domain containing 1
218677_at	4.72e-07	1.9e-08	2.06	S100A14	S100 calcium binding protein A14
232277_at	7.04e-07	3e-08	-2.34	SLC28A3	solute carrier family 28 member 3
202992_at	7.17e-07	3.07e-08	-2.18	C7	complement component 7
229476_s_at	7.69e-07	3.31e-08	-2.57	THRSP	thyroid hormone responsive
219300_s_at	8.25e-07	3.58e-08	2.32	CNTNAP2	contactin associated protein-like 2
209560_s_at	8.71e-07	3.81e-08	-3.26	DLK1	delta like non-canonical Notch ligand 1
205029_s_at	1.04e-06	4.62e-08	-2.43	FABP7	fatty acid binding protein 7
212236_x_at	1.18e-06	5.36e-08	-2.63	KRT17///JUP	keratin 17///junction plakoglobin
202311_s_at	1.85e-06	9.03e-08	2.18	COL1A1	collagen type I alpha 1 chain
214279_s_at	2.89e-06	1.5e-07	-2.26	NDRG2	NDRG family member 2
223475_at	3.42e-06	1.81e-07	-2.26	CRISPLD1	cysteine rich secretory protein LCCL domain containing 1
214087_s_at	3.61e-06	1.93e-07	-2.36	MYBPC1	myosin binding protein C, slow type
202018_s_at	5.23e-06	2.96e-07	-2.87	LTF	lactotransferrin
228010_at	6.62e-06	3.91e-07	2.06	PPP2R2C	protein phosphatase 2 regulatory subunit Bgamma
201525_at	7.25e-06	4.34e-07	-2.04	APOD	apolipoprotein D
203021_at	7.25e-06	4.34e-07	-2.35	SLPI	secretory leukocyte peptidase inhibitor
229947_at	7.35e-06	4.4e-07	-2.58	PI15	peptidase inhibitor 15
204855_at	9.95e-06	6.2e-07	-2.36	SERPINB5	serpin family B member 5
226086_at	1.09e-05	6.88e-07	2.52	SYT13	synaptotagmin 13
203915_at	1.61e-05	1.07e-06	2.71	CXCL9	C-X-C motif chemokine ligand 9
241994_at	2.56e-05	1.82e-06	-2.15	XDH	xanthine dehydrogenase
203757_s_at	2.93e-05	2.12e-06	3.4	CEACAM6	carcinoembryonic antigen related cell adhesion molecule 6
202504_at	3.08e-05	2.24e-06	-2.12	TRIM29	tripartite motif containing 29
209242_at	3.22e-05	2.36e-06	-2.1	PEG3	paternally expressed 3
229477_at	4.47e-05	3.43e-06	-2.06	THRSP	thyroid hormone responsive
205357_s_at	5.54e-05	4.39e-06	-2.13	AGTR1	angiotensin II receptor type 1
207951_at	5.75e-05	4.58e-06	-2.04	CSN2	casein beta
206224_at	6.14e-05	4.96e-06	2.11	CST1	cystatin SN
1562821_a_at	6.6e-05	5.39e-06	2.73	DSCAM-AS1	DSCAM antisense RNA 1
204304_s_at	6.69e-05	5.48e-06	-2.63	PROM1	prominin 1
213791_at	7.26e-05	6.05e-06	-2.1	PENK	proenkephalin
215145_s_at	8.55e-05	7.28e-06	2	CNTNAP2	contactin associated protein-like 2
237086_at	9.43e-05	8.17e-06	2.27	FOXA1	forkhead box A1
211657_at	0.00011	9.73e-06	2.93	CEACAM6	carcinoembryonic antigen related cell adhesion molecule 6
208350_at	0.000168	1.6e-05	-2.57	CSN1S1	casein alpha s1
201884_at	0.000188	1.81e-05	2.27	CEACAM5	carcinoembryonic antigen related cell adhesion molecule 5
214440_at	0.00026	2.64e-05	2.01	NAT1	N-acetyltransferase 1
227194_at	0.000286	2.94e-05	-2.01	FAM3B	family with sequence similarity 3 member B
204913_s_at	0.000816	9.94e-05	2	SOX11	SRY-box 11
206754_s_at	0.000857	0.000105	2.26	CYP2B7P///CYP2B6	cytochrome P450 family 2 subfamily B member 7, pseudogene///cytochrome P450 family 2 subfamily B member 6
229975_at	0.00116	0.000149	2.36	BMPR1B	bone morphogenetic protein receptor type 1B
242579_at	0.00149	0.000201	2.29	BMPR1B	bone morphogenetic protein receptor type 1B
207816_at	0.00175	0.000243	-2.09	LALBA	lactalbumin alpha
205916_at	0.00602	0.00102	2.2	S100A7	S100 calcium binding protein A7
