# Supplementary material for: Exosomal hsa-miR-21-5p is a biomarker for breast cancer diagnosis
Source: PeerJ. 2021 Sep 17;9:e12147. doi: 10.7717/peerj.12147 (PMC8451442; doi:10.7717/peerj.12147)
Supplement: Supplemental Information 3 [file peerj-09-12147-s003.xls]

## Sheet: 52_overlapping_mRNAs
52_overlapping_mRNAs_between Diff_and Target
Names	total	elements
Diff Target	52	BIRC5
		MAOA
		CDK1
		OXTR
		SPRY2
		CAPN6
		SQLE
		HOXA5
		CCNA2
		PDK4
		SAMD5
		EMCN
		NTRK2
		TCEAL7
		ABCA6
		EGFR
		MYLK
		CEP55
		GPAM
		CXCL10
		TGFBR3
		GPC3
		ACACB
		DMD
		BOC
		CERS6
		PCOLCE2
		SYNM
		SERPINB5
		HMGB3
		EZH2
		CHL1
		KIF2C
		ACVR1C
		LRRC15
		PTX3
		PELI1
		CREB5
		NFIB
		LIFR
		OSR1
		RRM2
		TOP2A
		PRR15
		CAV1
		BUB1B
		SOX11
		BMPR1B
		CTHRC1
		TP63
		CENPF
		MMP9
