# Supplementary material for: Exosomal hsa-miR-21-5p is a biomarker for breast cancer diagnosis
Source: PeerJ. 2021 Sep 17;9:e12147. doi: 10.7717/peerj.12147 (PMC8451442; doi:10.7717/peerj.12147)
Supplement: Supplemental Information 4 [file peerj-09-12147-s004.xls]

## Sheet: BP_results_of_P<0.05
BP_results_of_P<0.05
Category	Term	Count	%	PValue	Genes	List Total	Pop Hits	Pop Total	Fold Enrichment	Bonferroni	Benjamini	FDR
GOTERM_BP_DIRECT	GO:0007067~mitotic nuclear division	7	13.4615	9.01e-05	CDK1, KIF2C, CENPF, BUB1B, BIRC5, CEP55, CCNA2	51	248	16792	9.29349	0.0731372	0.0731372	0.13915
GOTERM_BP_DIRECT	GO:0045669~positive regulation of osteoblast differentiation	4	7.69231	0.000754	CTHRC1, SOX11, TP63, BMPR1B	51	60	16792	21.9503	0.470672	0.272451	1.15954
GOTERM_BP_DIRECT	GO:0010628~positive regulation of gene expression	6	11.5385	0.00106312	SPRY2, CDK1, CAV1, OSR1, SOX11, NTRK2	51	262	16792	7.54019	0.592081	0.258363	1.63055
GOTERM_BP_DIRECT	GO:2000811~negative regulation of anoikis	3	5.76923	0.00114846	CAV1, NTRK2, PDK4	51	17	16792	58.1038	0.620426	0.215083	1.76035
GOTERM_BP_DIRECT	GO:0043066~negative regulation of apoptotic process	7	13.4615	0.00221779	EGFR, SPRY2, CDK1, OSR1, MMP9, TP63, BIRC5	51	455	16792	5.06546	0.846135	0.312254	3.37333
GOTERM_BP_DIRECT	GO:0007062~sister chromatid cohesion	4	7.69231	0.00356401	KIF2C, CENPF, BUB1B, BIRC5	51	103	16792	12.7866	0.9507	0.394462	5.36873
GOTERM_BP_DIRECT	GO:0051301~cell division	6	11.5385	0.0037554	CDK1, KIF2C, CENPF, BUB1B, BIRC5, CCNA2	51	350	16792	5.64437	0.95807	0.364351	5.64928
GOTERM_BP_DIRECT	GO:0045907~positive regulation of vasoconstriction	3	5.76923	0.00407084	EGFR, CAV1, OXTR	51	32	16792	30.8676	0.967894	0.349387	6.10994
GOTERM_BP_DIRECT	GO:0072180~mesonephric duct morphogenesis	2	3.84615	0.00594653	GPC3, OSR1	51	2	16792	329.255	0.993447	0.428022	8.80604
GOTERM_BP_DIRECT	GO:0001501~skeletal system development	4	7.69231	0.00787215	SOX11, MMP9, TP63, BMPR1B	51	137	16792	9.61328	0.998722	0.486368	11.4985
GOTERM_BP_DIRECT	GO:0045944~positive regulation of transcription from RNA polymerase II promoter	9	17.3077	0.00794668	EGFR, OSR1, HOXA5, SOX11, TP63, BMPR1B, TOP2A, CXCL10, NFIB	51	981	16792	3.02069	0.9988	0.457429	11.6012
GOTERM_BP_DIRECT	GO:0031100~organ regeneration	3	5.76923	0.00862364	CDK1, TGFBR3, CCNA2	51	47	16792	21.0163	0.999325	0.4558	12.5289
GOTERM_BP_DIRECT	GO:0006468~protein phosphorylation	6	11.5385	0.0112199	PDK4, BUB1B, BIRC5, BMPR1B, MYLK, ACVR1C	51	456	16792	4.3323	0.999926	0.518898	16.0031
GOTERM_BP_DIRECT	GO:0008284~positive regulation of cell proliferation	6	11.5385	0.0122374	EGFR, SOX11, NTRK2, LIFR, BIRC5, CXCL10	51	466	16792	4.23933	0.999969	0.523559	17.3291
GOTERM_BP_DIRECT	GO:0016477~cell migration	4	7.69231	0.0145549	CDK1, CTHRC1, HOXA5, TGFBR3	51	172	16792	7.65709	0.999996	0.561324	20.2766
GOTERM_BP_DIRECT	GO:0033138~positive regulation of peptidyl-serine phosphorylation	3	5.76923	0.0184475	SPRY2, CAV1, NTRK2	51	70	16792	14.1109	1	0.625075	25.0073
GOTERM_BP_DIRECT	GO:0034141~positive regulation of toll-like receptor 3 signaling pathway	2	3.84615	0.0206616	PELI1, CAV1	51	7	16792	94.0728	1	0.644883	27.5797
GOTERM_BP_DIRECT	GO:0008283~cell proliferation	5	9.61538	0.0232766	EGFR, CDK1, KIF2C, CENPF, BUB1B	51	366	16792	4.49802	1	0.668128	30.5113
GOTERM_BP_DIRECT	GO:0042698~ovulation cycle	2	3.84615	0.023579	EGFR, BMPR1B	51	8	16792	82.3137	1	0.653091	30.8431
GOTERM_BP_DIRECT	GO:0007517~muscle organ development	3	5.76923	0.0288645	DMD, CENPF, CXCL10	51	89	16792	11.0985	1	0.709032	36.408
GOTERM_BP_DIRECT	GO:0034501~protein localization to kinetochore	2	3.84615	0.029388	CDK1, BUB1B	51	10	16792	65.851	1	0.698022	36.9358
GOTERM_BP_DIRECT	GO:0030857~negative regulation of epithelial cell differentiation	2	3.84615	0.0322799	CAV1, OSR1	51	11	16792	59.8645	1	0.715582	39.7781
GOTERM_BP_DIRECT	GO:0051310~metaphase plate congression	2	3.84615	0.0351632	KIF2C, CENPF	51	12	16792	54.8758	1	0.730723	42.4925
GOTERM_BP_DIRECT	GO:0061029~eyelid development in camera-type eye	2	3.84615	0.0380382	EGFR, SOX11	51	13	16792	50.6546	1	0.743895	45.0846
GOTERM_BP_DIRECT	GO:0010952~positive regulation of peptidase activity	2	3.84615	0.0380382	CAV1, PCOLCE2	51	13	16792	50.6546	1	0.743895	45.0846
GOTERM_BP_DIRECT	GO:0007095~mitotic G2 DNA damage checkpoint	2	3.84615	0.043763	CDK1, CCNA2	51	15	16792	43.9007	1	0.778858	49.9241
GOTERM_BP_DIRECT	GO:0048485~sympathetic nervous system development	2	3.84615	0.043763	SOX11, TP63	51	15	16792	43.9007	1	0.778858	49.9241
GOTERM_BP_DIRECT	GO:0007166~cell surface receptor signaling pathway	4	7.69231	0.0480315	EGFR, LIFR, OXTR, CXCL10	51	274	16792	4.80664	1	0.797289	53.2696

## Sheet: MF_results_of_P<0.05
MF_results_of_P<0.05
Category	Term	Count	%	PValue	Genes	List Total	Pop Hits	Pop Total	Fold Enrichment	Bonferroni	Benjamini	FDR
GOTERM_MF_DIRECT	GO:0005524~ATP binding	12	23.0769	0.00315915	EGFR, CDK1, KIF2C, NTRK2, PDK4, BUB1B, ACACB, BMPR1B, TOP2A, ABCA6, MYLK, ACVR1C	50	1495	16881	2.70999	0.436006	0.436006	3.82593
GOTERM_MF_DIRECT	GO:0003682~chromatin binding	6	11.5385	0.00536874	EGFR, CDK1, EZH2, CENPF, TP63, TOP2A	50	391	16881	5.18087	0.622566	0.385644	6.42144
GOTERM_MF_DIRECT	GO:0005518~collagen binding	3	5.76923	0.0131248	MMP9, LRRC15, PCOLCE2	50	60	16881	16.881	0.90849	0.549367	15.0311
GOTERM_MF_DIRECT	GO:0003690~double-stranded DNA binding	3	5.76923	0.0231174	EGFR, HMGB3, TP63	50	81	16881	12.5044	0.985497	0.65297	25.0506
GOTERM_MF_DIRECT	GO:0004674~protein serine/threonine kinase activity	5	9.61538	0.0233609	CDK1, OSR1, BUB1B, BMPR1B, ACVR1C	50	376	16881	4.48963	0.986137	0.575014	25.2807
GOTERM_MF_DIRECT	GO:0019901~protein kinase binding	5	9.61538	0.0233609	EGFR, SPRY2, CAV1, OSR1, CCNA2	50	376	16881	4.48963	0.986137	0.575014	25.2807
GOTERM_MF_DIRECT	GO:0017166~vinculin binding	2	3.84615	0.028658	DMD, SYNM	50	10	16881	67.524	0.99482	0.584032	30.1264
GOTERM_MF_DIRECT	GO:0016504~peptidase activator activity	2	3.84615	0.028658	CAV1, PCOLCE2	50	10	16881	67.524	0.99482	0.584032	30.1264
GOTERM_MF_DIRECT	GO:0001077~transcriptional activator activity, RNA polymerase II core promoter proximal region sequence-specific binding	4	7.69231	0.0310258	HOXA5, SOX11, TP63, NFIB	50	236	16881	5.72237	0.996669	0.557337	32.1976
GOTERM_MF_DIRECT	GO:0050998~nitric-oxide synthase binding	2	3.84615	0.0398946	CAV1, DMD	50	14	16881	48.2314	0.999369	0.601924	39.4642

## Sheet: CC_results_of_P<0.05
CC_results_of_P<0.05
Category	Term	Count	%	PValue	Genes	List Total	Pop Hits	Pop Total	Fold Enrichment	Bonferroni	Benjamini	FDR
GOTERM_CC_DIRECT	GO:0043235~receptor complex	5	9.61538	0.000404	EGFR, NTRK2, LIFR, TGFBR3, BMPR1B	51	127	18224	14.0682	0.0523541	0.0523541	0.471645
GOTERM_CC_DIRECT	GO:0030496~midbody	4	7.69231	0.00532872	CDK1, CENPF, BIRC5, CEP55	51	129	18224	11.0801	0.508658	0.299042	6.05627
GOTERM_CC_DIRECT	GO:0005578~proteinaceous extracellular matrix	5	9.61538	0.00619656	CTHRC1, GPC3, MMP9, TGFBR3, CHL1	51	268	18224	6.66667	0.562512	0.24086	7.0102
GOTERM_CC_DIRECT	GO:0005876~spindle microtubule	3	5.76923	0.00648413	CAPN6, CDK1, BIRC5	51	44	18224	24.3636	0.579032	0.194506	7.32435
GOTERM_CC_DIRECT	GO:0000775~chromosome, centromeric region	3	5.76923	0.0106944	KIF2C, CENPF, BIRC5	51	57	18224	18.807	0.760695	0.24874	11.8139
GOTERM_CC_DIRECT	GO:0045120~pronucleus	2	3.84615	0.0190512	EZH2, CENPF	51	7	18224	102.095	0.92256	0.347129	20.1413
GOTERM_CC_DIRECT	GO:0000776~kinetochore	3	5.76923	0.0208243	KIF2C, CENPF, BUB1B	51	81	18224	13.2346	0.939122	0.329573	21.8129
GOTERM_CC_DIRECT	GO:0000940~condensed chromosome outer kinetochore	2	3.84615	0.0217436	CENPF, BUB1B	51	8	18224	89.3333	0.946271	0.306133	22.6669
GOTERM_CC_DIRECT	GO:0000777~condensed chromosome kinetochore	3	5.76923	0.0237959	KIF2C, BUB1B, BIRC5	51	87	18224	12.3218	0.959365	0.299459	24.5428
GOTERM_CC_DIRECT	GO:0005814~centriole	3	5.76923	0.038485	BIRC5, CEP55, TOP2A	51	113	18224	9.48673	0.994591	0.406644	36.8012

## Sheet: KEGG_results_of_P<0.05
KEGG_results_of_P<0.05
Category	Term	Count	%	PValue	Genes	List Total	Pop Hits	Pop Total	Fold Enrichment	Bonferroni	Benjamini	FDR
KEGG_PATHWAY	hsa05206:MicroRNAs in cancer	6	11.5385	0.00455791	EGFR, SPRY2, SERPINB5, MMP9, EZH2, TP63	28	286	6879	5.1541	0.375334	0.375334	4.97095
KEGG_PATHWAY	hsa05161:Hepatitis B	4	7.69231	0.018532	MMP9, CREB5, BIRC5, CCNA2	28	145	6879	6.77734	0.854372	0.618388	18.8424
KEGG_PATHWAY	hsa04115:p53 signaling pathway	3	5.76923	0.0280467	CDK1, SERPINB5, RRM2	28	67	6879	11.0005	0.946608	0.623447	27.2037
KEGG_PATHWAY	hsa05205:Proteoglycans in cancer	4	7.69231	0.0424208	EGFR, CAV1, GPC3, MMP9	28	200	6879	4.91357	0.988492	0.672472	38.3563
