# Supplementary material for: Exosomal hsa-miR-21-5p is a biomarker for breast cancer diagnosis
Source: PeerJ. 2021 Sep 17;9:e12147. doi: 10.7717/peerj.12147 (PMC8451442; doi:10.7717/peerj.12147)
Supplement: Supplemental Information 6 [file peerj-09-12147-s006.xls]

## Sheet: miRNA-top15_mRNA_network
miRNA	mRNA
hsa-mir-425-5p	BIRC5
hsa-mir-22-3p	BUB1B
hsa-mir-3201	CAV1
hsa-mir-208b-5p	CAV1
hsa-mir-22-3p	CCNA2
hsa-mir-205-5p	CDK1
hsa-mir-4256	CDK1
hsa-mir-4645-3p	CDK1
hsa-mir-21-5p	CDK1
hsa-mir-205-5p	CENPF
hsa-mir-4645-3p	CEP55
hsa-mir-21-5p	DMD
hsa-mir-21-5p	EGFR
hsa-mir-219a-5p	EGFR
hsa-mir-429	EZH2
hsa-mir-4645-3p	KIF2C
hsa-mir-548l	KIF2C
hsa-mir-21-5p	MMP9
hsa-mir-425-5p	RRM2
hsa-mir-21-5p	TGFBR3
hsa-mir-136-3p	TGFBR3
hsa-mir-21-5p	TOP2A

## Sheet: the_top_10_miRNA-mRNA_network
node_name	MCC	DMNC	MNC	Degree	EPC	BottleNeck	EcCentricity	Closeness	Radiality	Betweenness	Stress	ClusteringCoefficient
CDK1	3	0	1	3	2.965	7	0.35	4.5	3.03333	22	22	0
TGFBR3	1	0	1	1	2.108	1	0.175	2.91667	2.33333	0	0	0
hsa-mir-205-5p	1	0	1	1	2.114	1	0.23333	3	2.45	0	0	0
CAV1	0	0	0	0	1	0	0	0	0	0	0	0
KIF2C	1	0	1	1	1.96	1	0.175	2.66667	2.1	0	0	0
hsa-mir-22-3p	0	0	0	0	1	0	0	0	0	0	0	0
EGFR	1	0	1	1	2.028	1	0.175	2.91667	2.33333	0	0	0
hsa-mir-425-5p	0	0	0	0	1	0	0	0	0	0	0	0
hsa-mir-21-5p	3	0	1	3	2.834	7	0.23333	4.33333	2.91667	18	18	0
hsa-mir-4645-3p	2	0	1	2	2.467	2	0.23333	3.66667	2.68333	10	10	0
