# Supplementary material for: Exosomal hsa-miR-21-5p is a biomarker for breast cancer diagnosis
Source: PeerJ. 2021 Sep 17;9:e12147. doi: 10.7717/peerj.12147 (PMC8451442; doi:10.7717/peerj.12147)
Supplement: Supplemental Information 8 [file peerj-09-12147-s008.xlsx]

## Sheet: Sheet1
miRNAs	Forward primer（5’-3’）	Loop primer（5’-3’）	Reverse primer
hsa-miR-21-5p	TAGCTTATCAGACTGA	GTCGTATCCAGTGCAGGGTCCGAGGTATTCGCACTGGATACGACTCAACA	GTGCAGGGTCCGAGGT
U6	ACAGAGAAGATTAGCATGGC	GTCGTATCCAGTGCAGGGTCCGAGGTATTCGCACTGGATACGACAAAATA
